# Supplementary material for: The contractome – a systems view of actomyosin contractility in non-muscle cells
Source: Oxford University Press journal article supplement (doi:10.1242/jcs.170068), 2015-05-29
Supplement: jcs170068_supp.pdf [file jcs170068_supp.pdf]

# Supplementary figure 1. Phenotypes in mouse due to mutations in contractome components

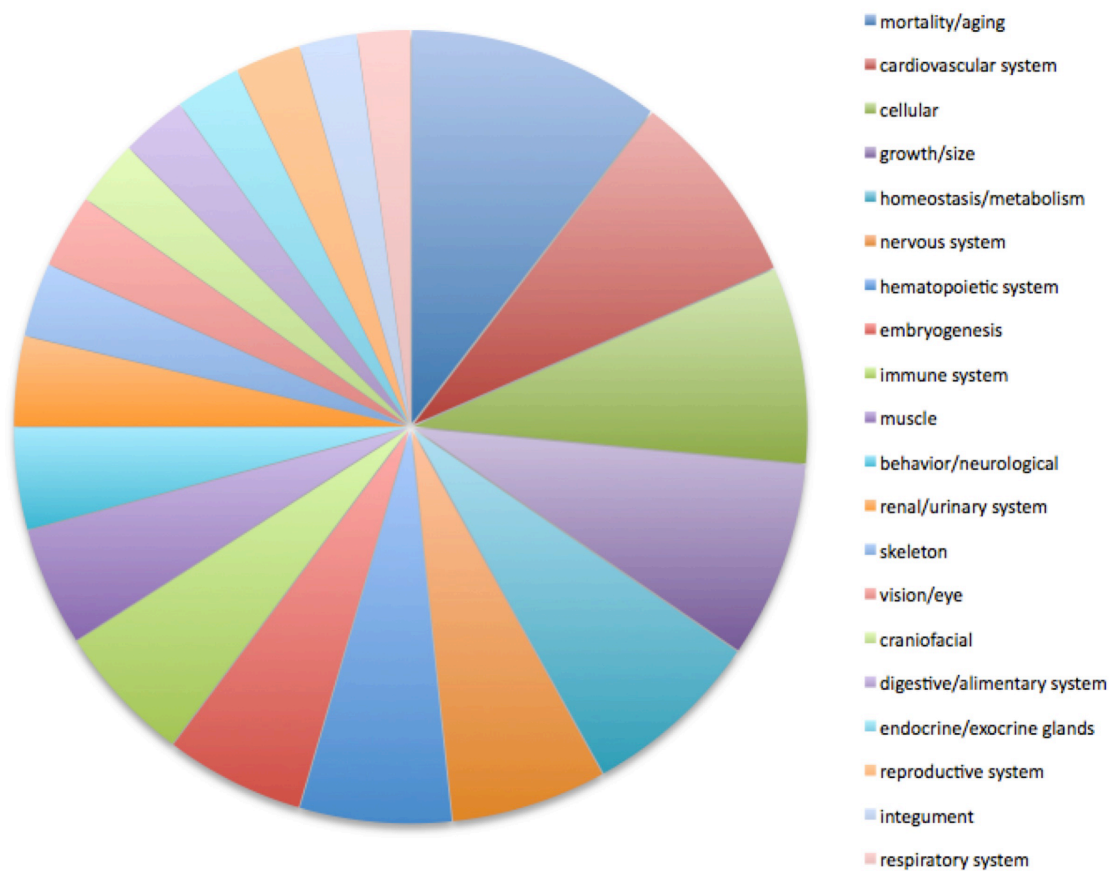

Table S1. Cellular functions of non-muscle myosin II mediated contractility

[Download Table S1](#)

Table S2.

[Download Table S2](#)

Table S3.

[Download Table S3](#)
